# Supplementary material for: Lithiophilic NiO hexagonal plates decorated Ni collector guiding uniform lithium plating for stable lithium metal anode
Source: Royal Society of Chemistry journal article supplement (doi:10.1039/c9ta09396f), 2019-01-01
Supplement: c9ta09396f1.pdf [file c9ta09396f1.pdf]

## Hexagonal Plate Lithiophilic NiO sheets on a Ni Collector for Stable Lithium Metal Anodes

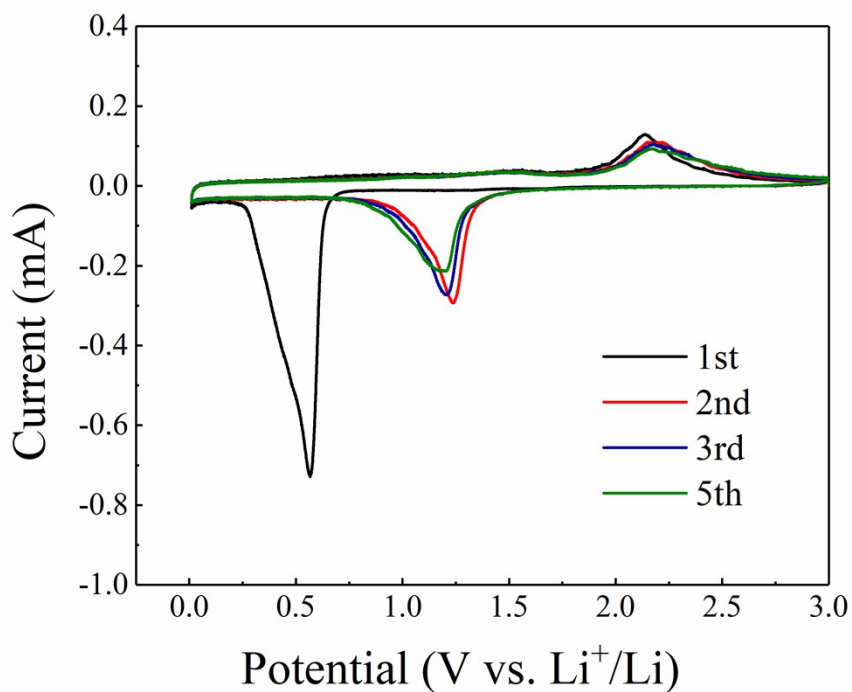

Figure S1. Cyclic voltammogram of HP-NiO-Ni electrode tested at a scan rate of 0.1mV/s.

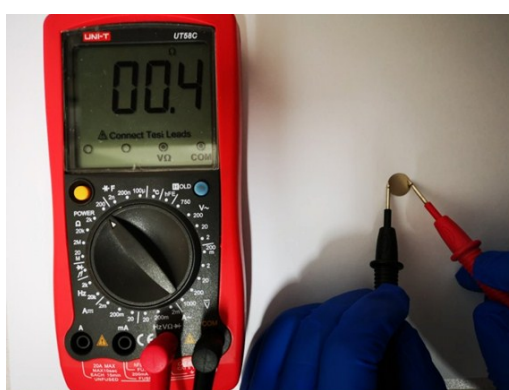

Barely Ni

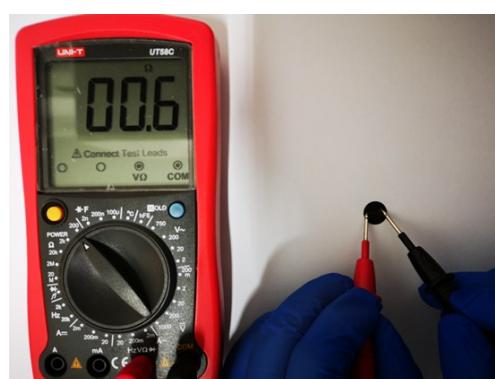

HP-NiO-Ni

Figure S2. Resistance measured for barely Ni and HP-NiO-Ni substrate.

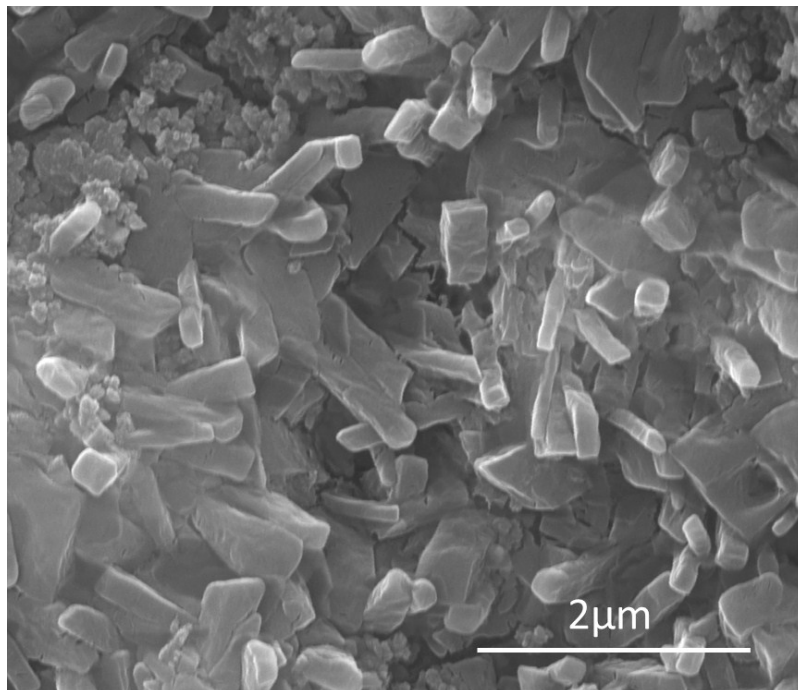

Figure S3. SEM images of the morphologies of HP-NiO-Ni electrode after cycling.

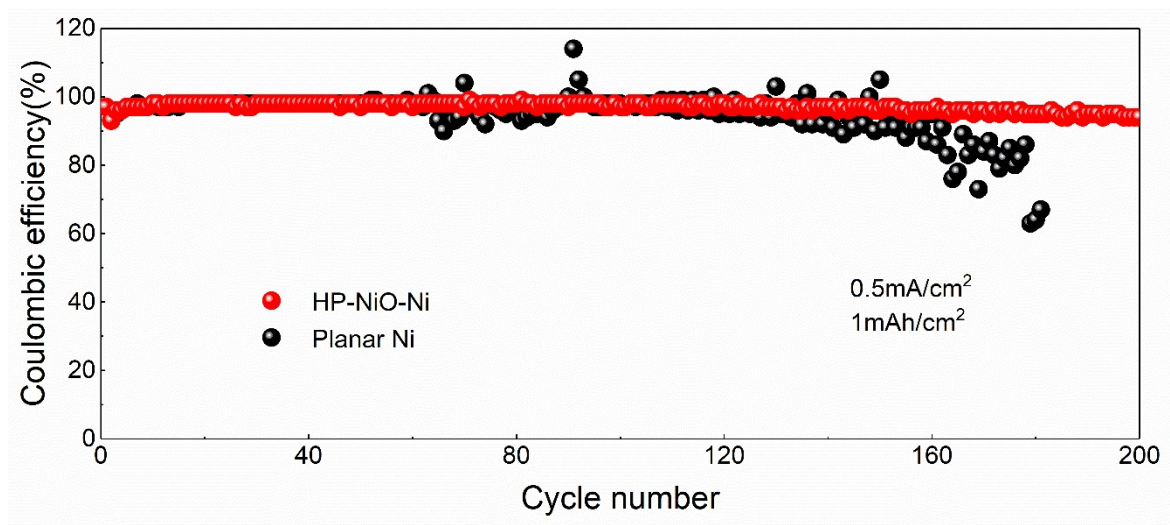

Figure S4. CE of Li plated onto HP-NiO-Ni and planar Ni substrate with a mount of

1mAh/cm<sup>2</sup> in 0.5mA/cm<sup>2</sup>.

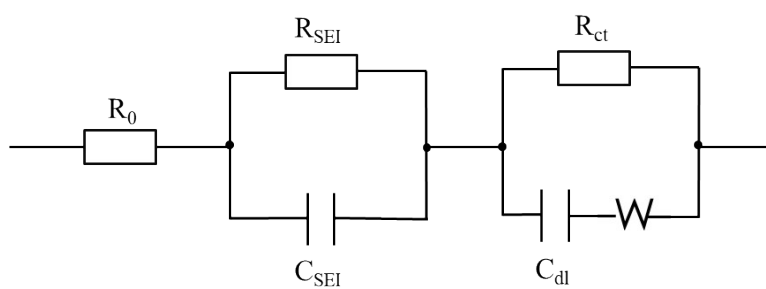

Figure S5. Equivalent circuit curves for Li | HP-NiO-Ni and Li | Planar Ni battery.

Table S1. SEI impedance fitted parameters for Figure 4 (d) and (e)

|                               | HP-NiO-Ni | Planar Ni |
|-------------------------------|-----------|-----------|
| 1 <sup>st</sup> ( $\Omega$ )  | 16.29     | 16.18     |
| 20 <sup>th</sup> ( $\Omega$ ) | 4.008     | 5.681     |
| 50 <sup>th</sup> ( $\Omega$ ) | 4.937     | 10.55     |
